# Supplementary material for: Extension of the Shelf-Life of Fresh Pasta Using Chickpea Flour Fermented with Selected Lactic Acid Bacteria
Source: PubMed Central journal article supplement (PMC7564801; doi:10.3390/microorganisms8091322), 2020-08-30

**Figure S1.** Representative RP-FPLC chromatogram (UV detector 214 nm) of the fraction WSE10 obtained from the chickpea sourdough. The gradient of the eluent B was represented by the dashed line. A-E refer to the fractions with antifungal activity.

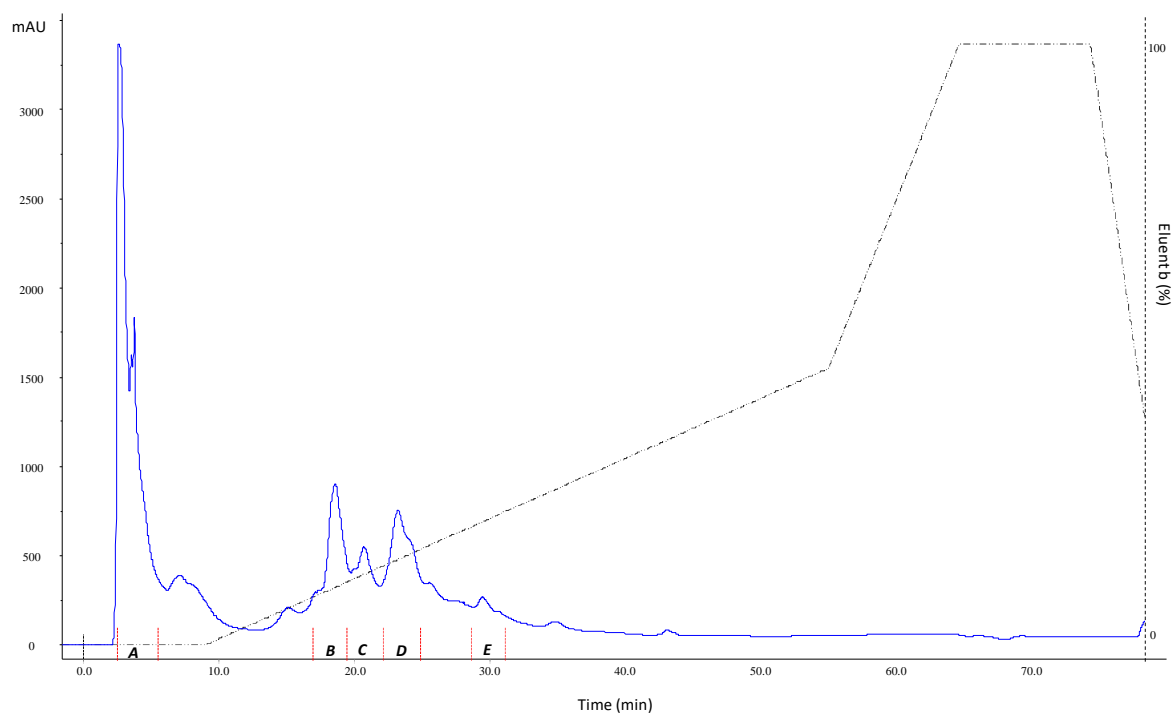

Supplement: microorganisms-08-01322-s001.pdf [file microorganisms-08-01322-s001.pdf]
